# Supplementary material for: Population Pharmacokinetic Modeling of Abacavir/Dolutegravir/Lamivudine to Support a Fixed-Dose Combination in Children with HIV-1
Source: PubMed Central journal article supplement — Infect Dis Ther. 2024 Jul 4;13(8):1877–91. doi: 10.1007/s40121-024-01008-y (PMC11266315; doi:10.1007/s40121-024-01008-y), 2024-07-04
Supplement: 40121_2024_1008_MOESM1_ESM.pdf [file 40121_2024_1008_MOESM1_ESM.pdf]

## **Population Pharmacokinetic Modeling of Abacavir/Dolutegravir/Lamivudine to Support a Fixed-Dose Combination in Children with HIV-1**

**Authors:** Hardik Chandasana<sup>1\*</sup>, Sven C. van Dijkman<sup>2</sup>, Rashmi Mehta<sup>3</sup>, Mark Bush<sup>4</sup>, Helena Rabie<sup>5</sup>, Patricia Flynn<sup>6</sup>, Tim R. Cressey<sup>7&8</sup>, Edward P. Acosta<sup>9</sup>, Kristina M. Brooks<sup>10</sup> for the IMPAACT 2019 Study Team

### **Affiliations:**

<sup>1</sup>GSK, Collegeville, PA, USA

<sup>2</sup>GSK, Brentford, UK

<sup>3</sup>GSK, Durham, NC, USA

<sup>4</sup>ViiV Healthcare, Durham, NC, USA

<sup>5</sup>University of Stellenbosch, Cape Town, South Africa

<sup>6</sup>St Jude Children's Research Hospital, Memphis, TN, USA

<sup>7</sup>Faculty of Associated Medical Sciences, Chiang Mai University, Chiang Mai, Thailand

<sup>8</sup>Department of Molecular & Clinical Pharmacology, University of Liverpool, UK

<sup>9</sup>University of Alabama at Birmingham, Birmingham, Alabama

<sup>10</sup>University of Colorado Anschutz Medical Campus, Aurora, CO, USA

### **Corresponding Author:**

Hardik Chandasana, PhD, Clinical Pharmacology Modeling & Simulation, GSK, 1250 South Collegeville Road, Collegeville, PA, 19406 (hardik.x.chandasana@gsk.com )

## Supplementary Figures

**Fig. S1.** Goodness-of-fit Plot for the ABC Model

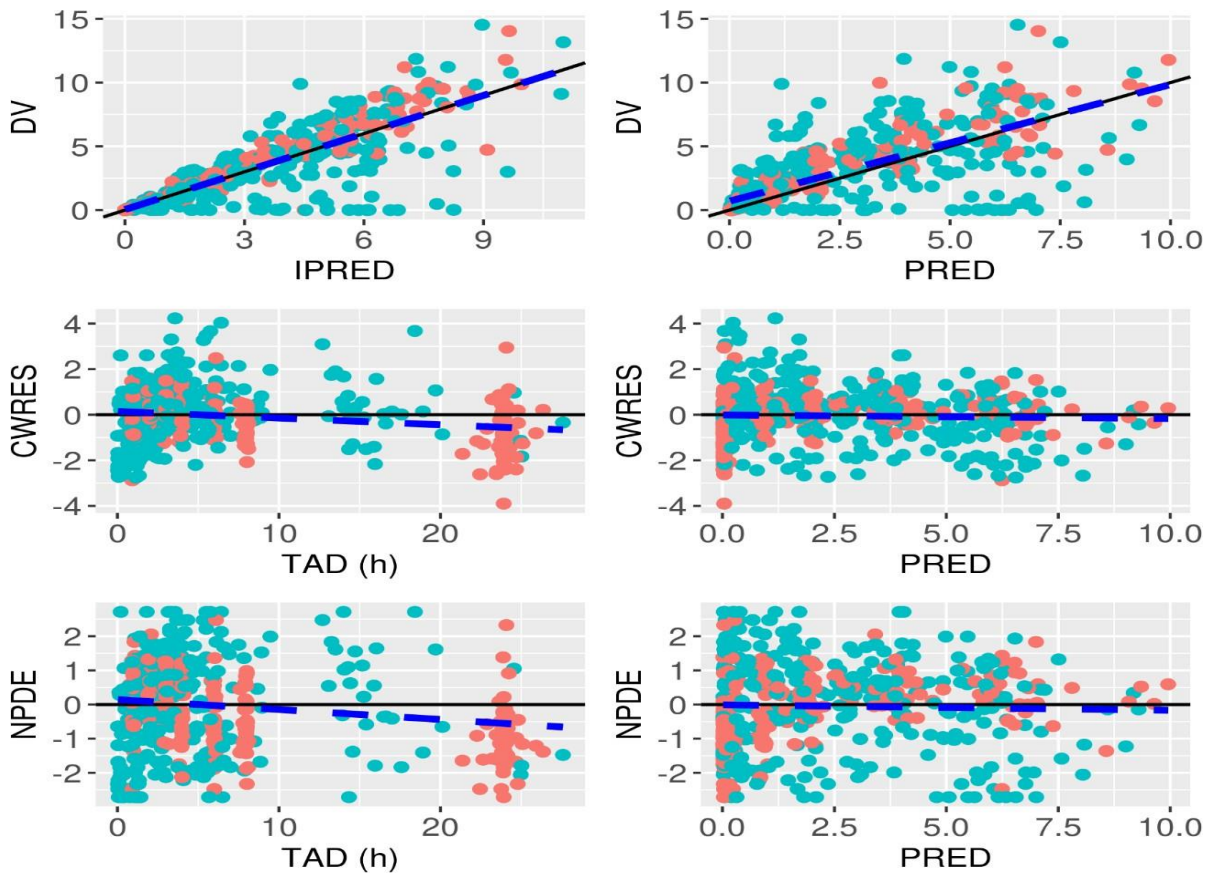

The colored symbols represent individual observations. The dashed blue line is a trend line (for population and individual predictions vs observations) or regression line (for CWRES vs population predictions and time after dose & NPDE vs population predictions and time after dose). DV= Observed concentrations ( $\mu\text{g/mL}$ ), IPRED= Individual Predicted Concentrations ( $\mu\text{g/mL}$ ), PRED= Population Predicted Concentrations ( $\mu\text{g/mL}$ ), TAD= Time after Dose, CWRES: conditional weighted residuals. NPDE: Normalized prediction distribution errors. Notes: Colors of circles represent different sampling scheme, red = Serial sampling, cyan = Sparse sampling

**Fig. S2.** Goodness-of-fit Plot for the DTG Model

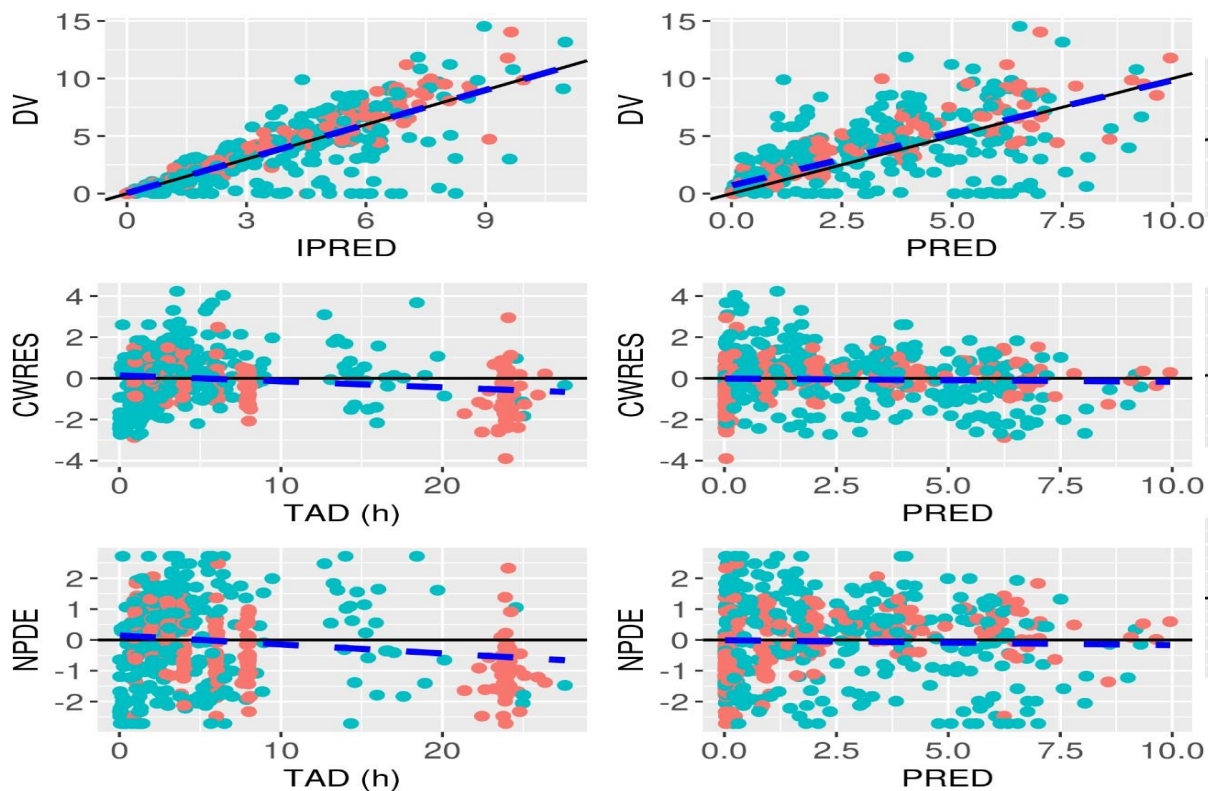

The colored symbols represent individual observations. The dashed blue line is a trend line (for population and individual predictions vs observations) or regression line (for CWRES vs population predictions and time after dose & NPDE vs population predictions and time after dose). DV= Observed concentrations ( $\mu\text{ g/mL}$ ), IPRED= Individual Predicted Concentrations ( $\mu\text{ g/mL}$ ), PRED= Population Predicted Concentrations ( $\mu\text{ g/mL}$ ), TAD= Time after Dose, CWRES: conditional weighted residuals. NPDE: Normalized prediction distribution errors. Notes: Colors of circles represent different sampling scheme, red = Serial sampling, cyan = Sparse sampling

**Fig.S3.** Goodness-of-fit Plot for the 3TC Model

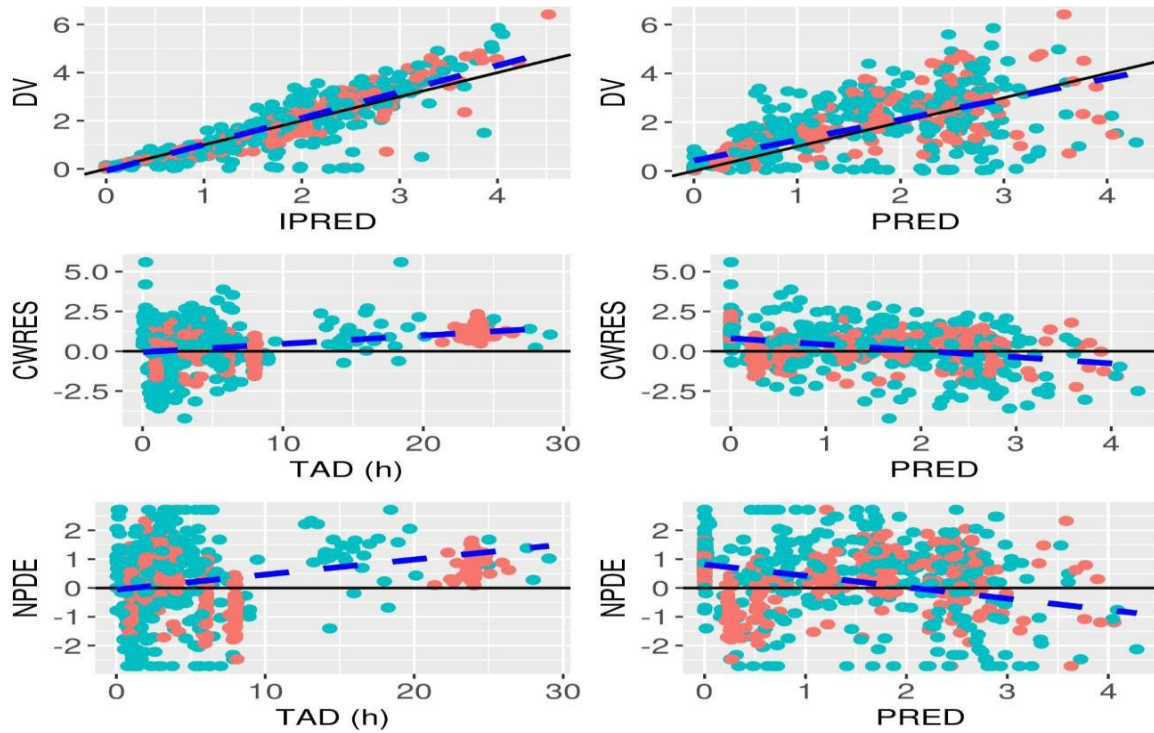

The colored symbols represent individual observations. The dashed blue line is a trend line (for population and individual predictions vs observations) or regression line (for CWRES vs population predictions and time after dose & NPDE vs population predictions and time after dose). DV= Observed concentrations ( $\mu\text{g/mL}$ ), IPRED= Individual Predicted Concentrations ( $\mu\text{g/mL}$ ), PRED= Population Predicted Concentrations ( $\mu\text{g/mL}$ ), TAD= Time after Dose, CWRES: conditional weighted residuals. NPDE: Normalized prediction distribution errors. Notes: Colors of circles represent different sampling scheme, red = Serial sampling, cyan = Sparse sampling

## Supplementary Tables

### Table S1. ABC/DTG/3TC (DTs & Tablets) Dosing in IMPAACT 2019 Study and US-FDA Approved Individual Component Dosing in Children $\geq 6$ kg

| Drug | Weight Bands  | ABC/DTG/3TC FDC Dose in IMPAACT 2019 Study | Approved Individual Component Dose |
|------|---------------|--------------------------------------------|------------------------------------|
| ABC  | ≥6 to <10 kg  | 180 mg DT                                  | 16 mg/kg Solution (96 - 160 mg)    |
|      | ≥10 to <14 kg | 240 mg DT                                  | 16 mg/kg Solution (160 - 224 mg)   |
|      | ≥14 to <20 kg | 300 mg DT                                  | 300 mg Tablet                      |
|      | ≥20 to <25 kg | 360 mg DT                                  | 450 mg Tablet                      |
|      | ≥25 to <40 kg | 600 mg Tablet                              | 600 mg Tablet                      |
| DTG  |               |                                            |                                    |
|      | ≥6 to <10 kg  | 15 mg DT                                   |                                    |
|      | ≥10 to <14 kg | 20 mg DT                                   |                                    |
|      | ≥14 to <20 kg | 25 mg DT                                   |                                    |
|      | ≥20 to <25 kg | 30 mg DT                                   |                                    |
|      | ≥25 to <40 kg | 50 mg Tablets                              |                                    |
| 3TC  |               |                                            |                                    |
|      | ≥6 to <10 kg  | 90 mg DT                                   | 10 mg/kg Solution (60 - 100 mg)    |
|      | ≥10 to <14 kg | 120 mg DT                                  | 10 mg/kg Solution (100 - 140 mg)   |
|      | ≥14 to <20 kg | 150 mg DT                                  | 150 mg Tablet                      |
|      | ≥20 to <25 kg | 180 mg DT                                  | 225 mg Tablet                      |
|      | ≥25 to <40 kg | 300 mg Tablet                              | 300 mg Tablet                      |

# IMPAACT 2019 doses are aligned with WHO weight band-based doses

**Table S2. IMPAACT 2019 Participant Characteristics and Demographic**

| Covariate                                          | (N=55)              |
|----------------------------------------------------|---------------------|
| <b>Baseline Age (years)</b>                        |                     |
| Mean (SD)                                          | 5.53 (3.1)          |
| Median [Min, Max]                                  | 6.00 [1.00, 11.0]   |
| <b>Baseline Body Weight (kg)</b>                   |                     |
| Mean (SD)                                          | 18.64 (7.4)         |
| Median [Min, Max]                                  | 17.00 [8.15, 39.30] |
| <b>Baseline Height (cm)</b>                        |                     |
| Mean (SD)                                          | 109.77 (20.2)       |
| Median [Min, Max]                                  | 113.0 [71.0, 153.0] |
| <b>Baseline Body Mass Index (kg/m<sup>2</sup>)</b> |                     |
| Mean (SD)                                          | 14.92 (1.7)         |
| Median [Min, Max]                                  | 14.7 [11.7, 21.6]   |
| <b>Baseline Body Surface Area (m<sup>2</sup>)</b>  |                     |
| Mean (SD)                                          | 0.75 (0.21)         |
| Median [Min, Max]                                  | 0.74 [0.42, 1.25]   |
| <b>Baseline Serum Creatinine (umol/L)</b>          |                     |
| Mean (SD)                                          | 33.97 (11.4)        |
| Median [Min, Max]                                  | 32.71 [15.0, 68.0]  |
| <b>Baseline Creatinine Clearance (mL/min)</b>      |                     |
| Mean (SD)                                          | 1.92 (0.548)        |
| Median [Min, Max]                                  | 1.82 [0.971, 3.85]  |
| <b>Baseline Alanine Aminotransferase (ukat/L)</b>  |                     |

|                                                     |                    |
|-----------------------------------------------------|--------------------|
| Mean (SD)                                           | 0.29 (0.10)        |
| Median [Min, Max]                                   | 0.28 [0.13, 0.63]  |
| <b>Baseline Aspartame Aminotransferase (ukat/L)</b> |                    |
| Mean (SD)                                           | 0.55 (0.13)        |
| Median [Min, Max]                                   | 0.53 [0.30, 0.95]  |
| <b>Baseline Total Bilirubin (umol/L)</b>            |                    |
| Mean (SD)                                           | 7.04 (4.1)         |
| Median [Min, Max]                                   | 6.30 [1.40, 19.84] |
| <b>Gender (%)</b>                                   |                    |
| Male                                                | 30 (54.5%)         |
| Female                                              | 25 (45.5%)         |
| <b>Race (%)</b>                                     |                    |
| Black or African American                           | 37 (67.3%)         |
| Asian                                               | 17 (30.9%)         |
| All Others                                          | 1 (1.8%)           |

**Table S3. NCA Calculated vs. Individual Post-hoc ABC Steady-State PK Parameters Following Once Daily Oral Dosing of DTG/ABC/3TC FDC doses in IMPAACT 2019 Study (Intensive PK Population Group Only)**

| Weight Band (kg) | DTG/ABC/3TC Dosage Form | ABC Dose | N | Analysis Method    | PK Parameter GM (95% CI) |                               |                         |
|------------------|-------------------------|----------|---|--------------------|--------------------------|-------------------------------|-------------------------|
|                  |                         |          |   |                    | C <sub>max</sub> (µg/mL) | AUC <sub>0-24</sub> (µg*h/mL) | C <sub>24</sub> (µg/mL) |
| ≥6 to <10        | DT                      | 180 mg   | 7 | PopPK <sup>a</sup> | 5.67<br>(3.92 -8.19)     | 15.60<br>(10.9 -22.20)        | 0.004<br>(0.003 -0.006) |
|                  |                         |          |   |                    | 7.30                     | 17.7                          | 0.003                   |

|            |         |        |   |                    |                       |                          |                         |
|------------|---------|--------|---|--------------------|-----------------------|--------------------------|-------------------------|
|            |         |        | 7 | NCA <sup>b</sup>   | (6.05 – 8.81)         | (13.02 – 23.94)          | (0.001 -0.007)          |
| ≥10 to <14 | DT      | 240 mg | 7 | PopPK <sup>a</sup> | 8.06<br>(6.11 -10.60) | 19.20<br>(14.90 -24.80)  | 0.012<br>(0.004 -0.040) |
|            |         |        | 7 | NCA <sup>b</sup>   | 8.36<br>(5.68 -12.31) | 19.8<br>(12.71 - 30.73)  | 0.005<br>(0.002 -0.013) |
| ≥14 to <20 | DT      | 300 mg | 7 | PopPK <sup>a</sup> | 6.30<br>(5.42-7.32)   | 14.60<br>(12.30 - 17.40) | 0.004<br>(0.002 -0.007) |
|            |         |        | 7 | NCA <sup>b</sup>   | 6.26<br>(4.73 -8.28)  | 15.1<br>(10.54 - 21.61)  | 0.003<br>(0.001 -0.006) |
| ≥20 to <25 | DT      | 360 mg | 7 | PopPK <sup>a</sup> | 8.70<br>(6.18-12.30)  | 18.30<br>(14.90 - 22.50) | 0.004<br>(0.003 -0.008) |
|            |         |        | 7 | NCA <sup>b</sup>   | 6.65<br>(5.17 -8.56)  | 17.35<br>(14.52 - 20.73) | 0.004<br>(0.002 -0.007) |
| ≥25 to <40 | Tablets | 600 mg | 7 | PopPK <sup>a</sup> | 9.86<br>(8.01-12.10)  | 24.40<br>(20.70 - 28.70) | 0.011<br>(0.005-0.025)  |
|            |         |        | 7 | NCA <sup>b</sup>   | 9.04<br>(7.40 -11.04) | 25.74<br>(22.51 - 29.44) | 0.011<br>(0.003 -0.037) |

<sup>a</sup>Model based Individual Post-hoc PK Parameters

<sup>b</sup>NCA PK parameters [14]

**Table S4. NCA Calculated vs. Individual Post-hoc DTG Steady-State PK Parameters Following Once Daily Oral Dosing of DTG/ABC/3TC FDC doses in IMPAACT 2019 Study (Intensive PK Population Group Only)**

| Weight Band (kg) | DTG/ABC/3TC Dosage Form | DTG Dose | N | Analysis Method    | PK Parameter GM (95%CI)  |                               |                         |
|------------------|-------------------------|----------|---|--------------------|--------------------------|-------------------------------|-------------------------|
|                  |                         |          |   |                    | C <sub>max</sub> (µg/mL) | AUC <sub>0-24</sub> (µg*h/mL) | C <sub>24</sub> (µg/mL) |
| ≥6 to <10        | DT                      | 15 mg    | 7 | PopPK <sup>a</sup> | 6.58<br>(5.71 -7.59)     | 76.80<br>(62.3 -94.80)        | 0.94<br>(0.60 -1.49)    |
|                  |                         |          | 7 | NCA <sup>b</sup>   | 7.40<br>(5.74 - 9.53)    | 75.9<br>(56.0 - 102.8)        | 0.91<br>(0.52 -1.61)    |
|                  |                         |          | 7 | PopPK <sup>a</sup> | 7.27<br>(6.57 -8.04)     | 97.3<br>(82.1-115.0)          | 1.63<br>(1.08 -2.44)    |

|            |         |       |   |                    |                      |                          |                      |
|------------|---------|-------|---|--------------------|----------------------|--------------------------|----------------------|
| ≥10 to <14 | DT      | 20 mg | 7 | NCA <sup>b</sup>   | 8.85<br>(7.28-10.75) | 91.0<br>(65.6 – 126.11)  | 1.22<br>(0.65 -2.29) |
| ≥14 to <20 | DT      | 25 mg | 7 | PopPK <sup>a</sup> | 6.59<br>(5.95-7.30)  | 74.30<br>(63.90 -86.40)  | 0.85<br>(0.59-1.22)  |
|            |         |       | 7 | NCA <sup>b</sup>   | 7.04<br>(6.02 -8.23) | 71.45<br>(57.66 -88.53)  | 0.79<br>(0.53 -1.16) |
| ≥20 to <25 | DT      | 30 mg | 7 | PopPK <sup>a</sup> | 6.66<br>(6.13-7.25)  | 84.50<br>(71.00-101.00)  | 1.28<br>(0.85 -1.93) |
|            |         |       | 7 | NCA <sup>b</sup>   | 7.29<br>(6.26 -8.50) | 84.44<br>(66.49 -107.24) | 1.35<br>(0.64 -2.84) |
| ≥25 to <40 | Tablets | 50mg  | 7 | PopPK <sup>a</sup> | 5.86<br>(5.42-6.33)  | 78.60<br>(70.60 -87.50)  | 1.17<br>(0.93 -1.46) |
|            |         |       | 7 | NCA <sup>b</sup>   | 6.25<br>(5.18 -7.55) | 71.80<br>(63.19 -81.58)  | 0.98<br>(0.76 -1.26) |

<sup>a</sup>Model based Individual Post-hoc PK Parameters

<sup>b</sup>NCA PK parameters [14]

**Table S5. NCA Calculated vs. Individual Post-hoc 3TC Steady-State PK Parameters Following Once Daily Oral Dosing of DTG/ABC/3TC FDC doses in IMPAACT 2019 Study (Intensive PK Population Group Only)**

| Weight Band (kg) | DTG/ABC/3TC Dosage Form | 3TC Dose | N | Analysis Method    | PK Parameter GM (95%CI)  |                               |                          |
|------------------|-------------------------|----------|---|--------------------|--------------------------|-------------------------------|--------------------------|
|                  |                         |          |   |                    | C <sub>max</sub> (µg/mL) | AUC <sub>0-24</sub> (µg*h/mL) | C <sub>24</sub> (ng/mL)  |
| ≥6 to <10        | DT                      | 90 mg    | 7 | PopPK <sup>a</sup> | 2.27<br>(1.75 -2.96)     | 9.42<br>(6.53 – 13.60)        | 0.017<br>(0.004 - 0.065) |
|                  |                         |          | 7 | NCA <sup>b</sup>   | 2.29<br>(1.61 – 3.27)    | 10.7<br>(7.10 – 15.99)        | 0.055<br>(0.038 - 0.077) |
| ≥10 to <14       | DT                      | 120 mg   | 7 | PopPK <sup>a</sup> | 3.22<br>(2.75 -3.78)     | 14.10<br>(11.90 – 16.90)      | 0.010<br>(0.003-0.036)   |
|                  |                         |          | 7 | NCA <sup>b</sup>   | 3.55                     | 14.2                          | 0.046                    |



|            |         |        |   |                    |                       |                          |                          |
|------------|---------|--------|---|--------------------|-----------------------|--------------------------|--------------------------|
|            |         |        |   |                    | (2.99 – 4.21)         | (11.39 -17.61)           | (0.030 - 0.070)          |
| ≥14 to <20 | DT      | 180 mg | 7 | PopPK <sup>a</sup> | 2.67<br>(2.26 – 3.17) | 11.30<br>(9.71 – 13.2)   | 0.005<br>(0.002 - 0.011) |
|            |         |        | 7 | NCA <sup>b</sup>   | 2.92<br>(2.36 -3.60)  | 13.02<br>(11.28 -15.02)  | 0.058<br>(0.042 - 0.081) |
| ≥20 to <25 | DT      | 150 mg | 7 | PopPK <sup>a</sup> | 2.80<br>(2.11 – 3.72) | 12.50<br>(10.30 –15.10)  | 0.023<br>(0.009 - 0.059) |
|            |         |        | 7 | NCA <sup>b</sup>   | 2.99<br>(2.24 -3.99)  | 14.51<br>(12.46 -16.90)  | 0.060<br>(0.051 –0.071)  |
| ≥25 to <40 | Tablets | 300 mg | 7 | PopPK <sup>a</sup> | 3.94<br>(3.29 – 4.72) | 19.20<br>(15.30 - 24.00) | 0.012<br>(0.003-0.053)   |
|            |         |        | 7 | NCA <sup>b</sup>   | 4.15<br>(3.18 -5.41)  | 21.73<br>(17.13 -27.58)  | 0.084<br>(0.061 –0.115)  |

<sup>a</sup>Model based Individual Post-hoc PK Parameters

<sup>b</sup>NCA PK parameters [14]

### Table S6. ABC PopPK NONMEM Code

\$PROBLEM

\$INPUT

\$DATA

\$SUBROUTINES ADVAN4 TRANS4

\$PK

FLAG=0

OCC1=0

IF (OCC.EQ.1) OCC1 = 1

OCC2=0

IF (OCC.EQ.2) OCC2 = 1

OCCCL = OCC1 \* ETA(5) + OCC2 \* ETA(6)

TVKA=THETA(1)

TVVQ=THETA(2)

TVV2=THETA(3)

TVV3=THETA(4)

TVCL=THETA(5)

CLW=(WT/15.6)\*\*THETA(6)

V2W=(WT/15.6)\*\*THETA(7)  
TVFT=THETA(8) ; F TABLET  
TVFS=THETA(9) ; F SOLUTION

IF (FLAG.EQ.0) THEN  
TVF=1  
ELSE  
TVF= (1-FORM)\*TVFS + FORM\*TVFT  
ENDIF

KA=TVKA  
Q=TVVQ\*EXP(ETA(1))  
V2=(TVV2\*V2W)\*EXP(ETA(2))  
V3=(TVV3)\*EXP(ETA(3))  
CL=(TVCL\*CLW)\*EXP(ETA(4)+OCCCL)  
F1=TVF  
S2=V2

\$ERROR  
DEL=0  
IF (F.EQ.0) DEL=1  
W=F+DEL  
Y=F\*EXP(ERR(1))  
IPRED=F  
IRES=DV-IPRED  
IWRES=IRES/W

**Table S7. DTG PopPK NONMEM Code**

\$PROBLEM  
\$INPUT  
\$DATA  
\$SUBROUTINES ADVAN2 TRANS2  
\$PK

IF (FORM.EQ.3) THEN  
FORMK=1  
ELSE  
FORMK=0  
ENDIF

PMA=AGE\*52+40  
HILL=THETA(7)  
TM50=THETA(8)  
FMAT=(PMA\*\*HILL/(PMA\*\*HILL+TM50\*\*HILL))

TVCL = THETA(1)  
TVV = THETA(2)  
TVKA = THETA(3)  
TVF1 = THETA(4)

```

CL = TVCL*FMAT*((WT/70)**THETA(5))*EXP(ETA(1)+ETA(4))
V = TVV*((WT/70)**THETA(6))*EXP(ETA(2))
KA = TVKA*(THETA(9)**FORMK)*EXP(ETA(3)+ETA(5))
F1 = TVF1*FORMK + 1*(1-FORMK)
S2 = V
$ERROR
DEL=0
IF (F.EQ.0) DEL=1
W=F+DEL

IPRED=F
IRES=DV-IPRED
IWRES=IRES/W

Y = F + F*ERR(1)+ERR(2)

```

**Table S8. 3TC PopPK NONMEM Code**

```

$PROBLEM
$INPUT
$DATA
$SUBROUTINES ADVAN2 TRANS2
$PK
ROUTE=1
FORM=1
OCC1=0
IF (OCC.EQ.1) OCC1 = 1
OCC2=0
IF (OCC.EQ.2) OCC2 = 1
OCC3=0
IF (OCC.EQ.3) OCC3 = 1
OCCCL = OCC1 * ETA(4) + OCC2 * ETA(5) + OCC3 * ETA(6)
OCCKA = OCC1 * ETA(7) + OCC2 * ETA(8) + OCC3 * ETA(9)
OCCV = OCC1 * ETA(10) + OCC2 * ETA(11) + OCC3 * ETA(12)
CLW=(WGHT/18.5)**THETA(6) ; wt as covariate
VWT=(WGHT/18.5)**THETA(7)
TVCL= THETA(1)*CLW
TVV=THETA(2)*VWT
TVKA=THETA(3)
CL=TVCL*EXP(ETA(1)+OCCCL)
V=TVV*EXP(ETA(2)+OCCV)
KA=TVKA*EXP(ETA(3)+OCCKA)
ALAG1= THETA(4)

```

```
FSOL = THETA(8) ; F1 SOLUTION
FTAB = THETA(9) ; F1 TABLET
IF (ROUTE.EQ.0) THEN
F1 =1 ; iv
ELSE
F1= (1-FORM)*FSOL + FTAB*FORM
ENDIF
S2=V
$ERROR
DEL=0.015
IF (F.EQ.0) DEL=1
W=F+DEL
WT=THETA(5)**2
ROOT=SQRT(1+WT*(F**2))
Y=F+EPS(1)*ROOT
IPRED=F
IRES=DV-IPRED
IWRES=IRES/W

LQ=0.0025
TDV=DV
IF(TDV.LT.LQ) TDV=LQ
```
